# Supplementary material for: The Urethral Microbiota of Men with and without Idiopathic Urethritis
Source: PubMed Central journal article supplement (PMC9600694; doi:10.1128/mbio.02213-22), 2022-10-03

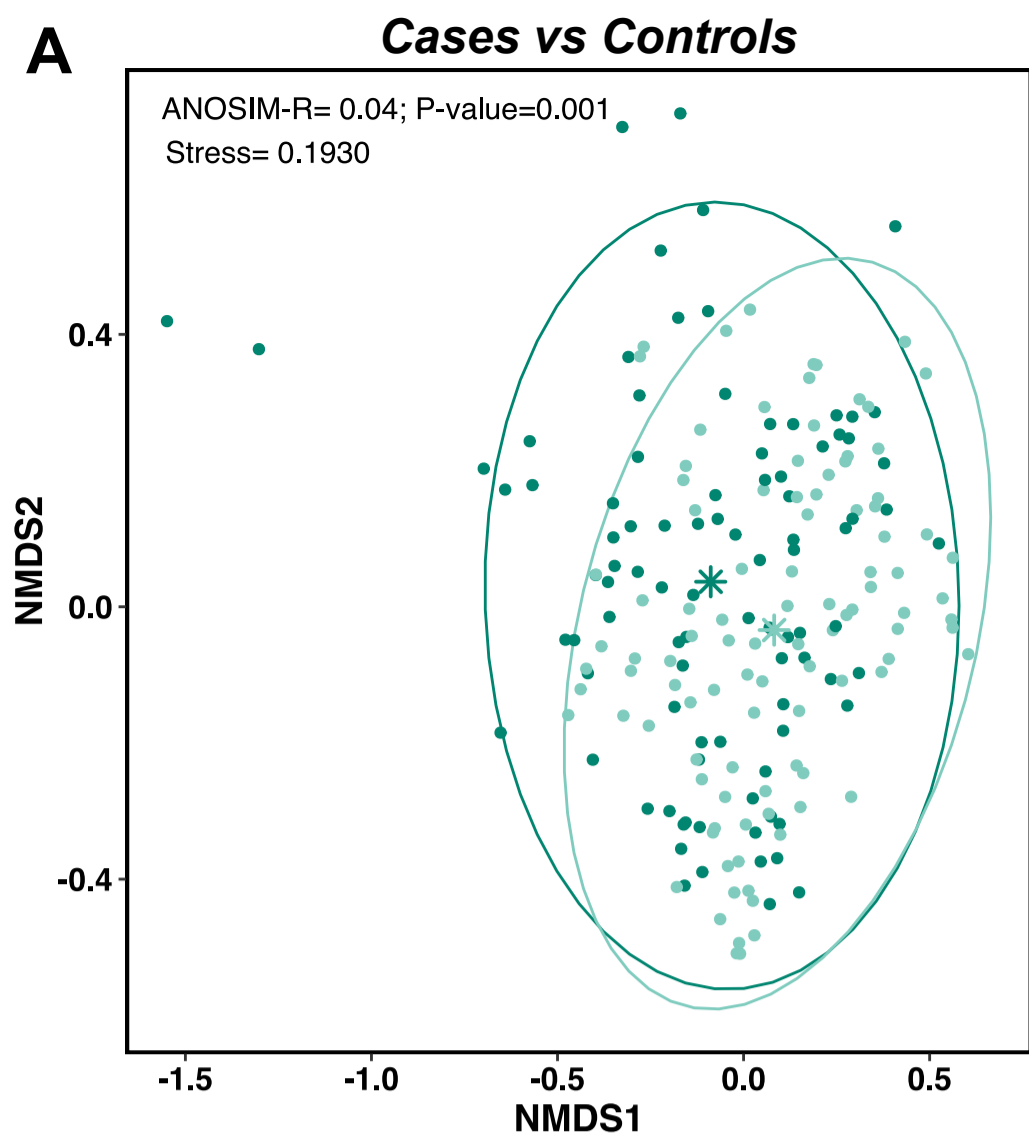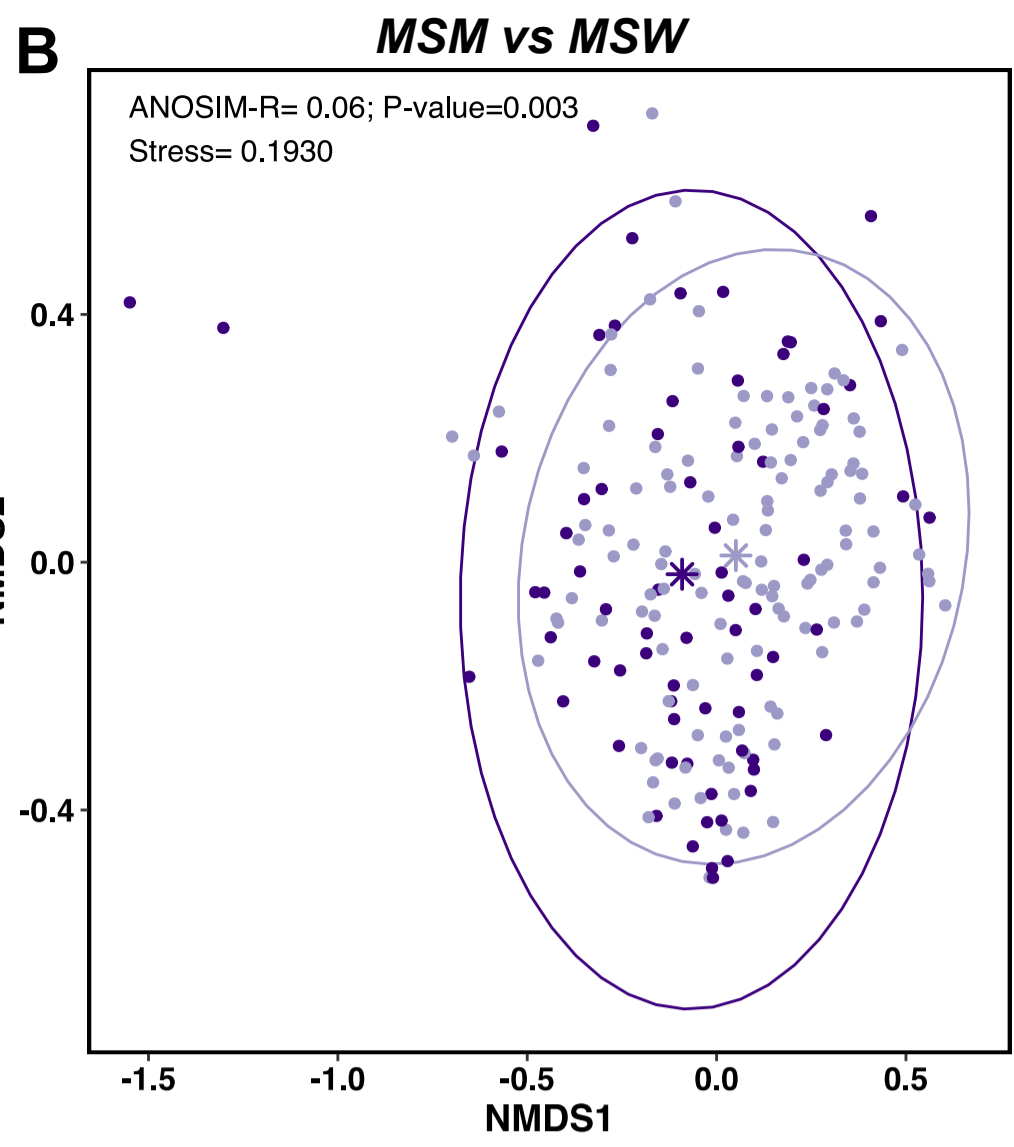

- IU cases
- Controls
- MSM
- MSW

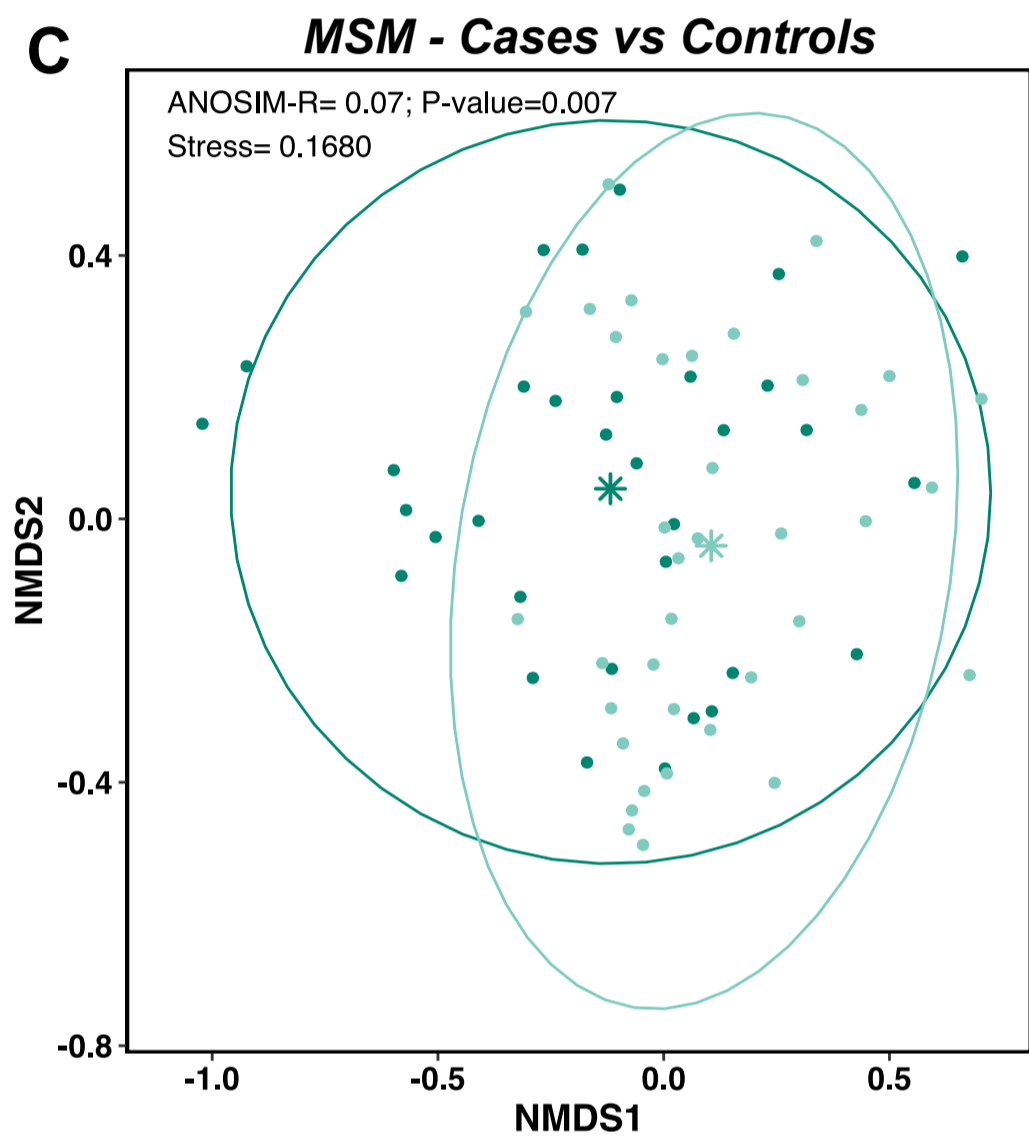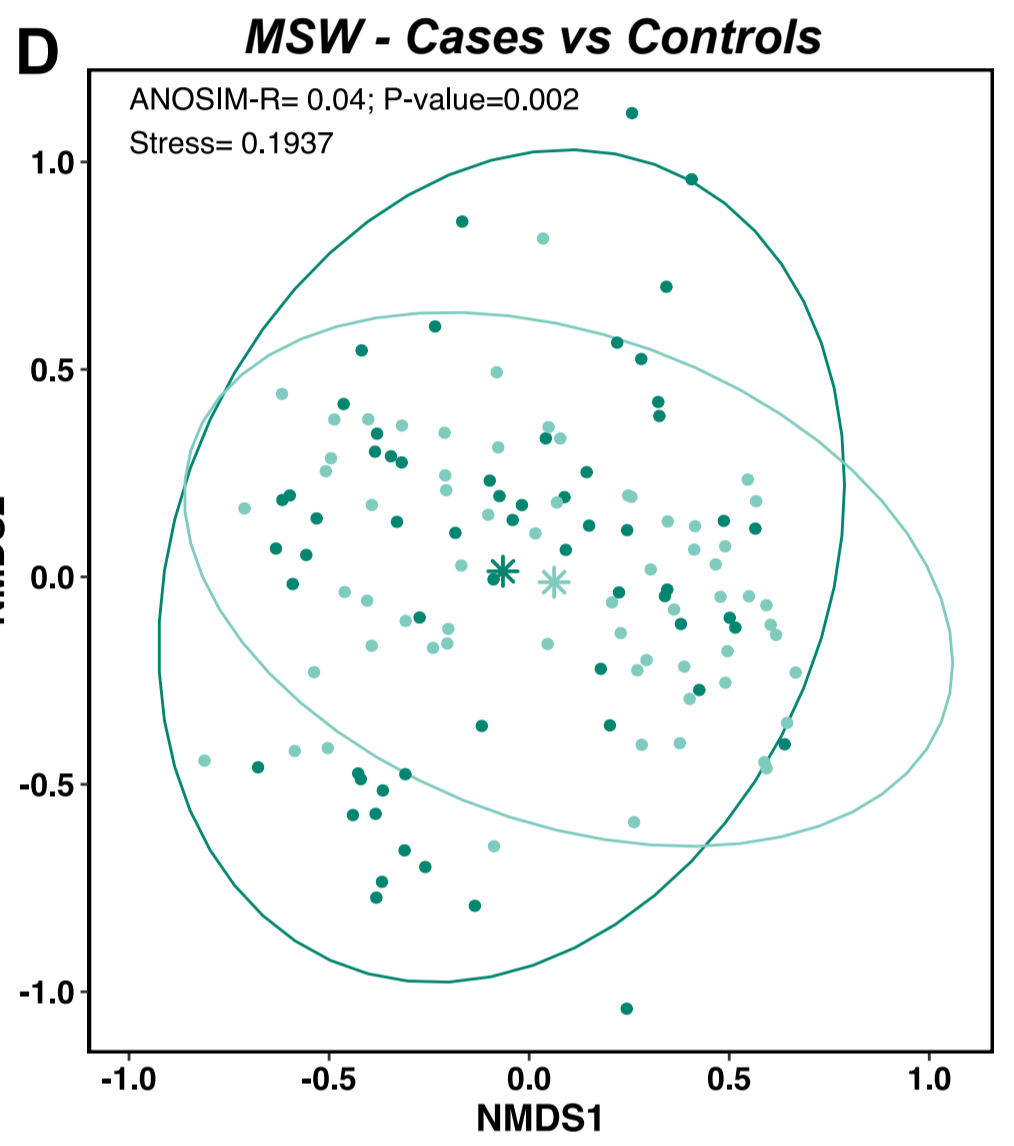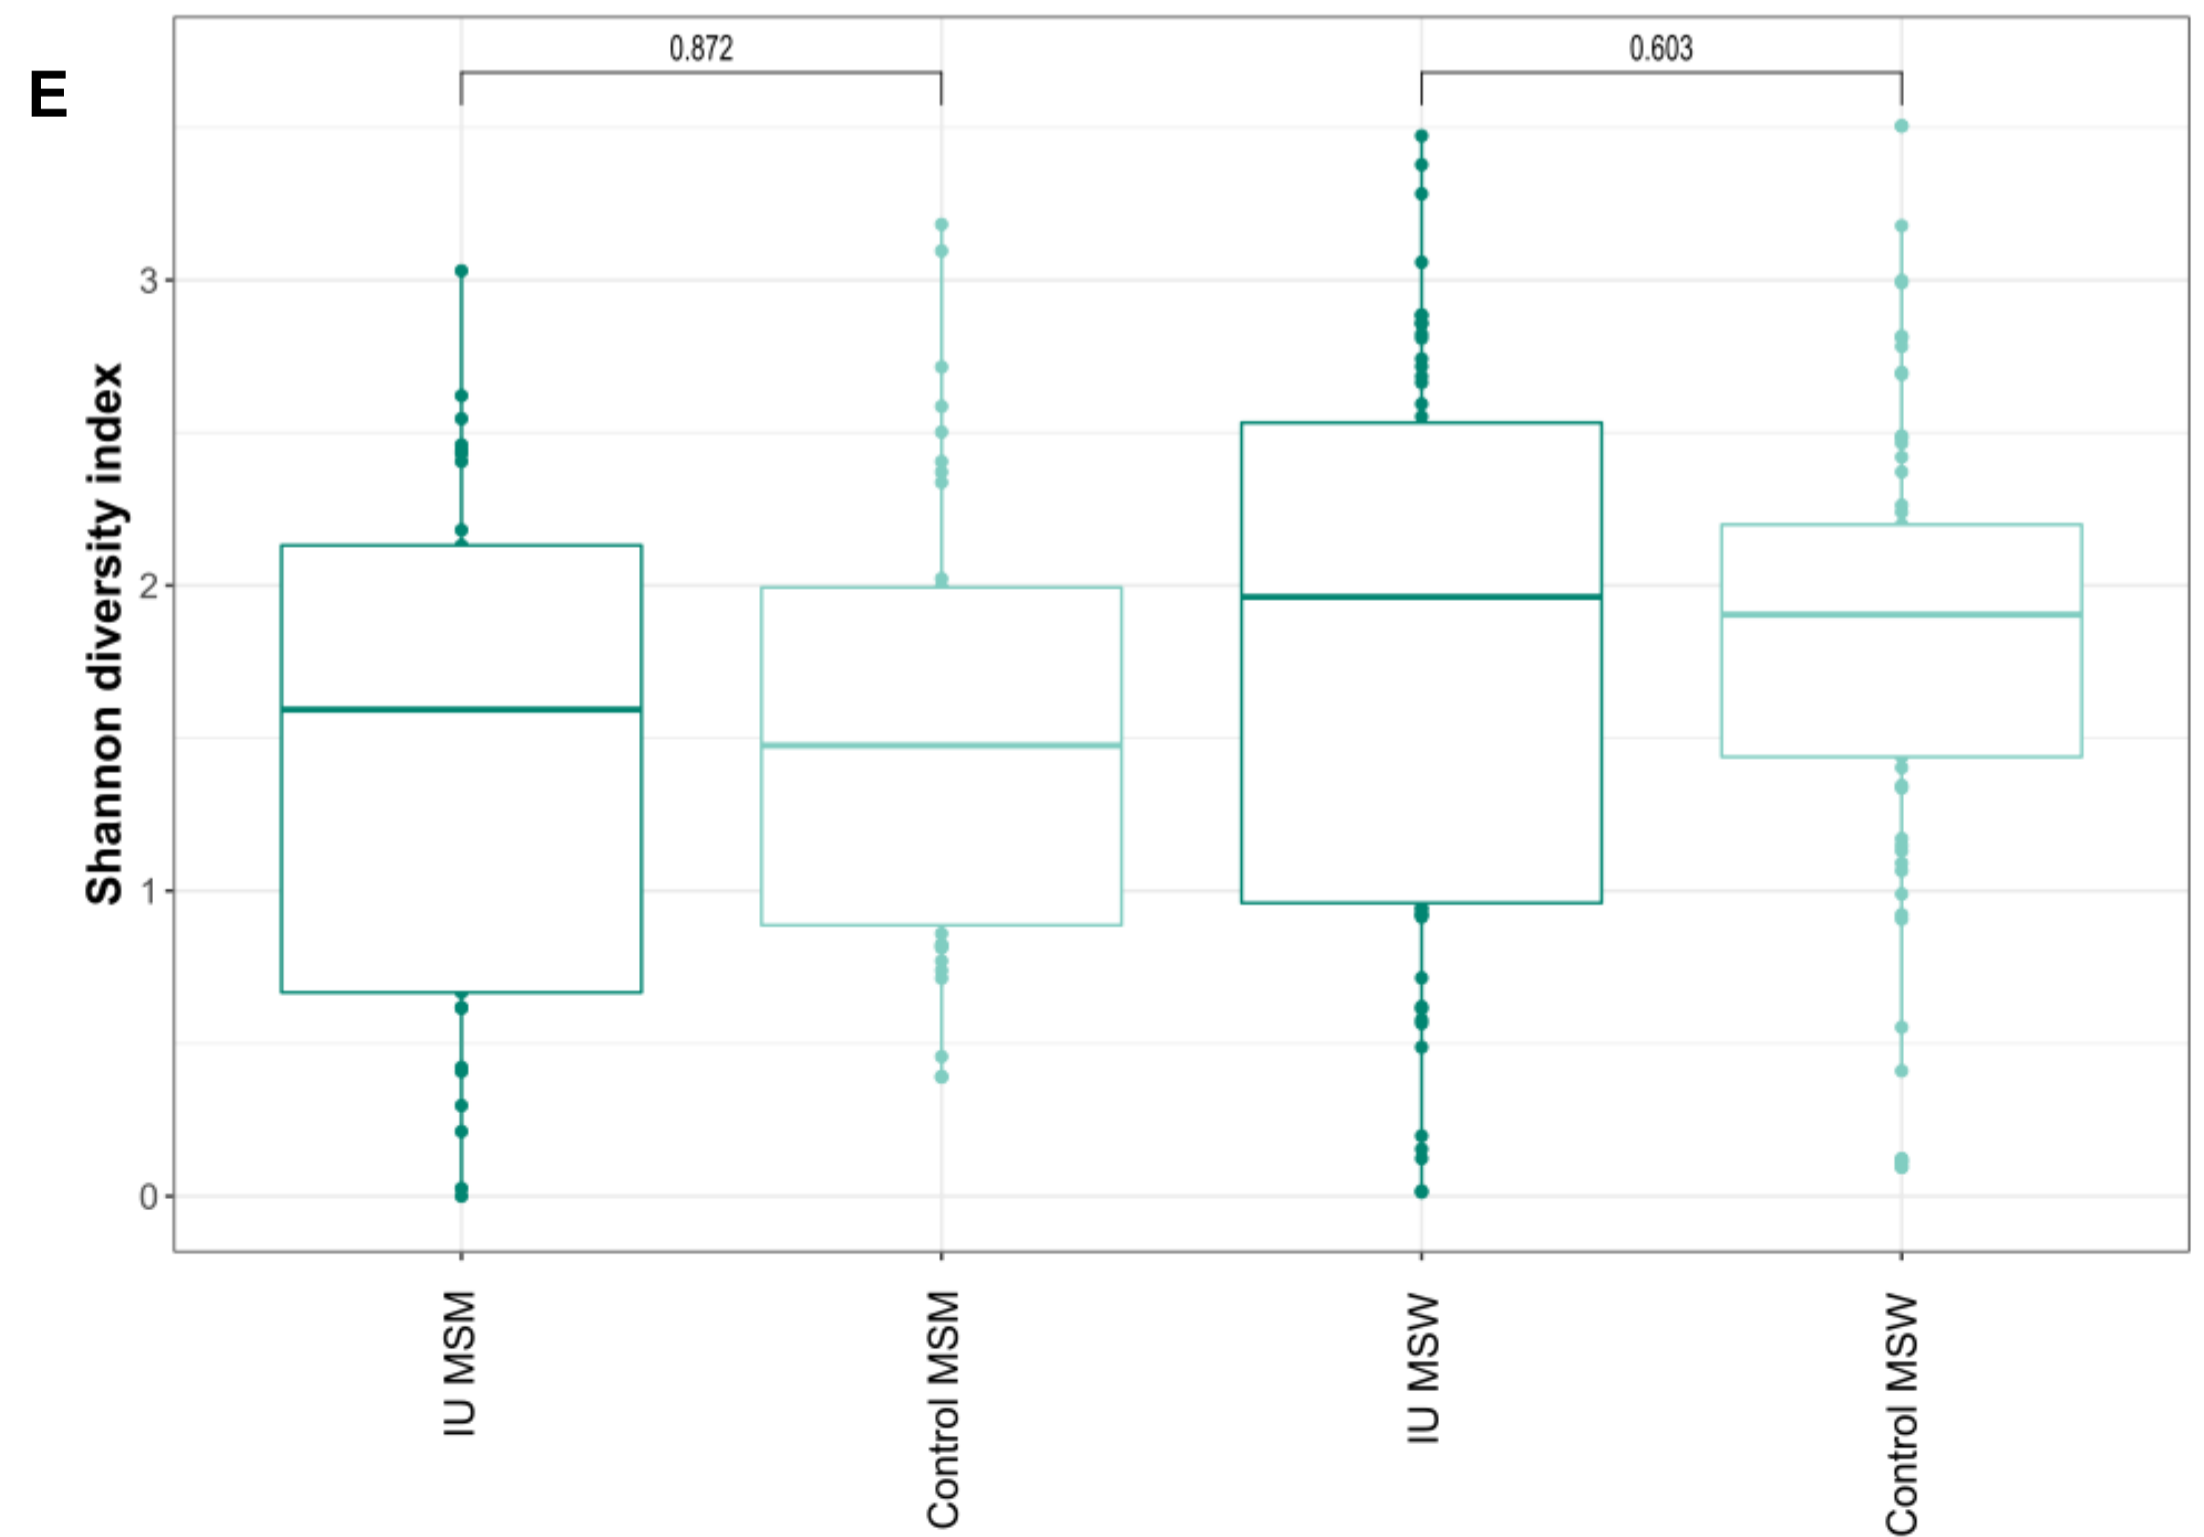

Supplement: mbio.02213-22-s0010.pdf [file mbio.02213-22-s0010.pdf]
